# Supplementary material for: The application of Schweizer's reagent with FTIR imaging spectroscopic solutions for microplastics advanced analysis of feces samples
Source: Research Square preprint supplement (doi:10.21203/rs.3.rs-6427909/v1), 2025-05-06
Supplement: Supplementary file 1 [file 763c93b831e83861525ed15e.docx]

Supplementary material for

**The application of Schweizer's reagent with FTIR imaging spectroscopic solutions for microplastics advanced analysis of feces samples**

Miloš Ilić1, Tamara Mutić1, Dragana Stanić-Vučinić1, Mirjana Turkalj2,3,4, Ivana Banić2, Jelena Mutić1*, and Tanja Ćirković Veličković1,5*

*1 University of Belgrade - Faculty of Chemistry, Studentski trg 12-16, 11000 Belgrade, Serbia*

*2Srebrenjak Children’s Hospital, Zagreb, Croatia*

*3Faculty of Medicine, Josip Juraj Strossmayer University of Osijek, HR-31000 Osijek, Croatia*

*4School of Medicine, Catholic University of Croatia, HR-10000 Zagreb, Croatia*

*5 Serbian Academy of Sciences and Arts, Knez Mihajlova 35, 11000 Belgrade, Serbia*

Content of Supplementary material:

**Tables:**

**Table S1.** Physical properties of polymer standards: particle size and density range.

**Figures:**

**Figure S1.** Optical microscope image of the polystyrene standard after digestion using Protocol D. The image was captured with an Olympus Microscope BX51M Metallurgical under UV light to assess digestion's effect on the standard's surface.

**Figure S2.** An optical microscope image of the polystyrene standard after digestion using Protocol D. The image was captured with an Olympus Microscope BX51M Metallurgical under visible light to assess the effect of digestion on the standard's surface.

**Figure S3.** Microscopic Analysis of a Silicone Filter Containing Digested Fecal Material. (A, B). Optical microscope images acquired under visible and UV light, respectively.
(C) Micro-FTIR image of the entire filter, illustrating the uniform distribution of particles.
(D) Chemical mapping of the filter using micro-FTIR.

**Table S1.** Physical properties of polymer standards: particle size and density range.

| **No.** | **Polymer** | **Name** | **Size (µm)** | **Density (g/ml)** |
| --- | --- | --- | --- | --- |
| 1 | PP | Polypropylene | 500 | 0.89-0.91 |
| 2 | HDPE | High-density polyethylene | 500 | 0.95-0.97 |
| 3 | LDPE | Low-density polyethylene | 500 | 0.91-0.94 |
| 4 | PVC | Polyvinyl chloride | 100 | 1.20-1.45 |
| 5 | PS | Polystyrene | 120 | 0.94-1.11 |
| 6 | PET | Polyethylene terephthalate | 120 | 1.38-1.39 |
| 7 | PA6 | Polycaprolactam | 120 | 1.13-1.50 |


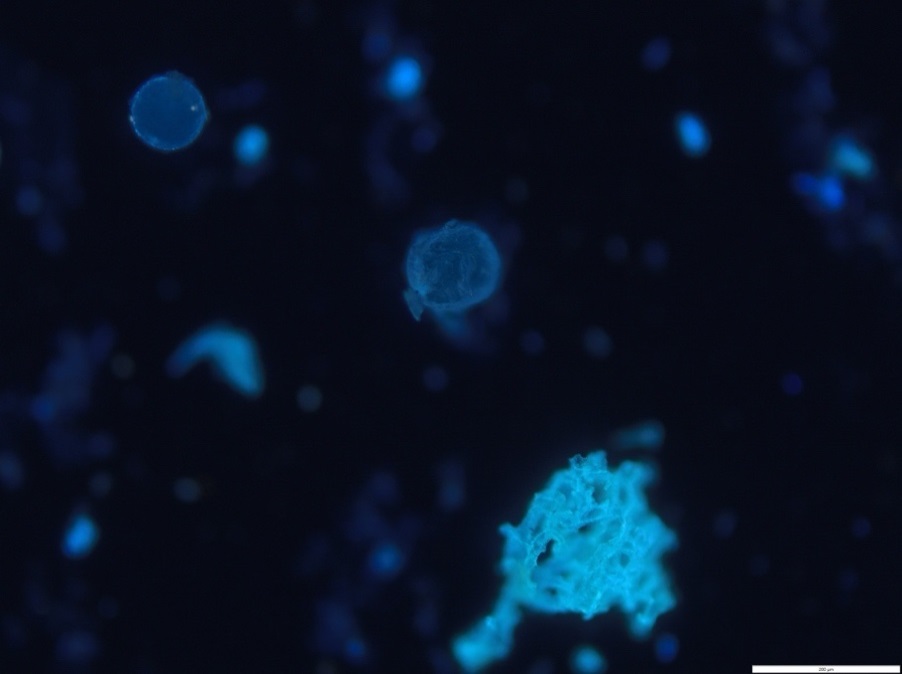


**Figure S1.** Optical microscope image of the polystyrene standard after digestion using Protocol D. The image was captured with an Olympus Microscope BX51M Metallurgical under UV light to assess digestion's effect on the standard's surface.


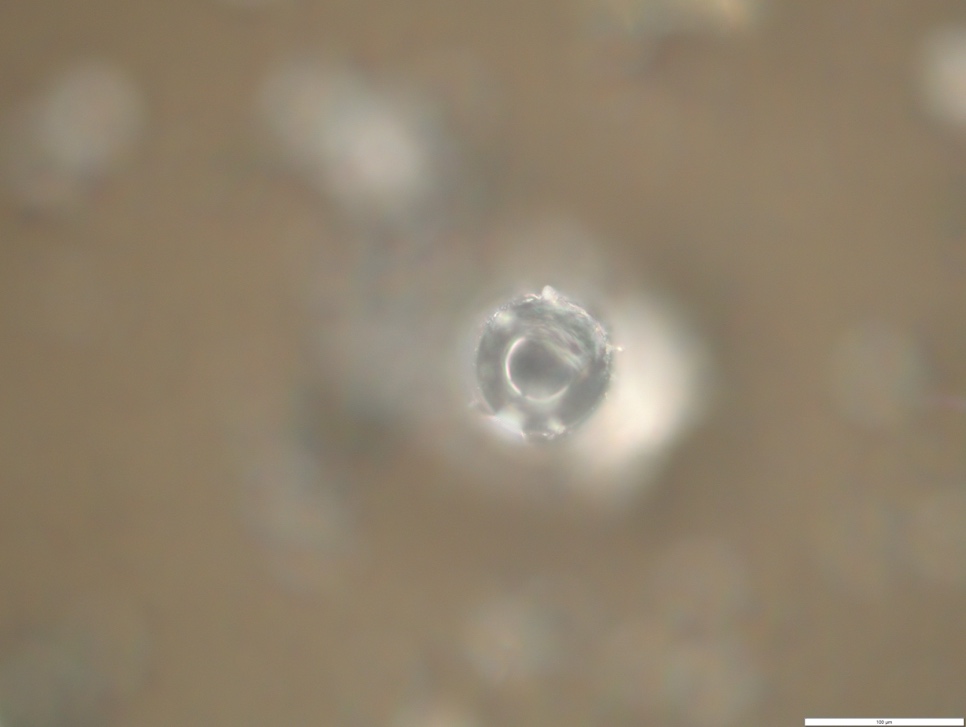


**Figure S2.** An optical microscope image of the polystyrene standard after digestion using Protocol D. The image was captured with an Olympus Microscope BX51M Metallurgical under visible light to assess the effect of digestion on the standard's surface.

| A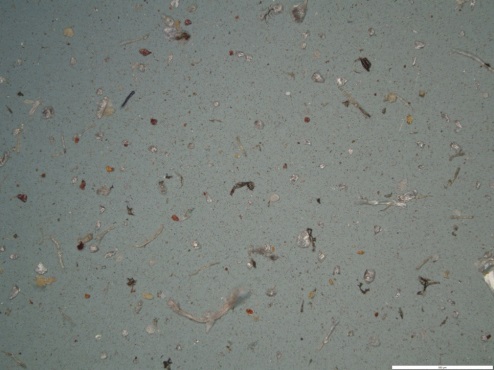 | B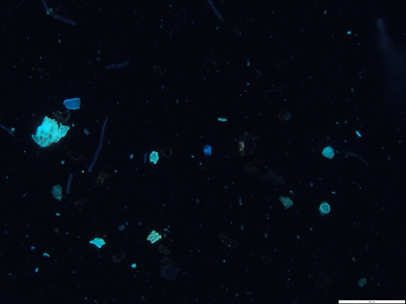 |
| --- | --- |
| 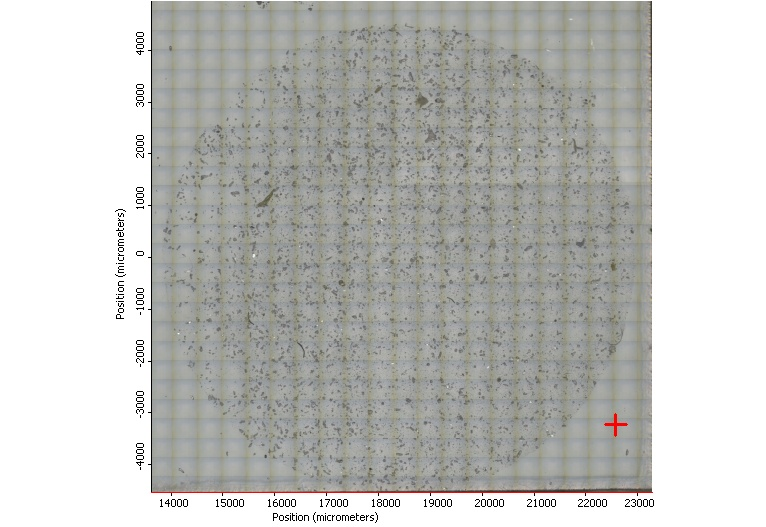 | 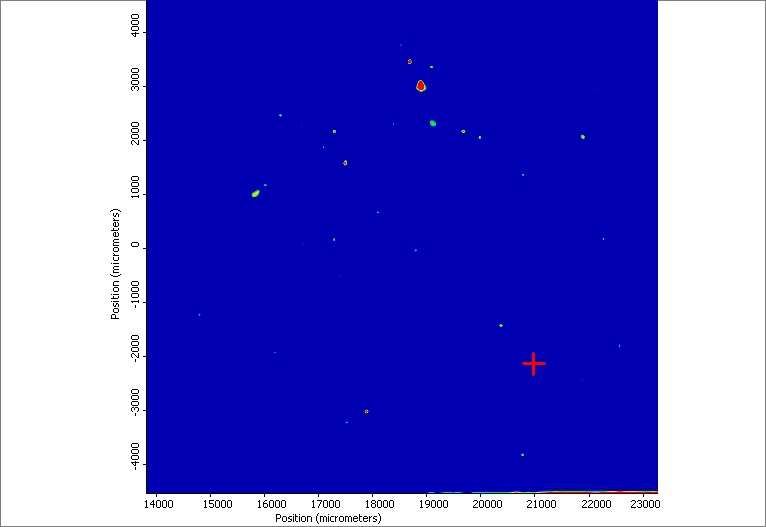 |

**Figure S3. Microscopic Analysis of a Silicone Filter Containing Digested Fecal Material**. (A, B). Optical microscope images acquired under visible and UV light, respectively.
(C) Micro-FTIR image of the entire filter, illustrating the uniform distribution of particles.
(D) Chemical mapping of the filter using micro-FTIR.
